# Supplementary material for: Glut1 Deficiency Syndrome (Glut1DS): State of the art in 2020 and recommendations of the international Glut1DS study group
Source: PubMed Central journal article supplement (PMC7469861; doi:10.1002/epi4.12414), 2020-08-13
Supplement: EPI4-5-354-s001.pdf [file EPI4-5-354-s001.pdf]

## Glut1D consensus: Questions for Discussion (2018):

Please highlight/bold/underline your answers and re-email back to me (joerg.klepper@klinikum-ab-alz.de). Please remember – only one survey per center. Thanks!

1. Glut1D is diagnosed on a) clinical features, b) LP: hypoglycorrachia with normal to low CSF lactate, and c) genetics: mutations in the SLC2A1 gene.

Please tick **\*** for the combination of diagnostic criteria that are the minimum necessary to **confirm** Glut1D:

| Clinical features | LP | genetics | confirms diagnosis of Glut1D<br>(multiple * possible) |
|-------------------|----|----------|-------------------------------------------------------|
| a                 |    |          |                                                       |
|                   | b  |          |                                                       |
|                   |    | c        |                                                       |
| a                 | b  |          |                                                       |
|                   | b  | c        |                                                       |
| a                 |    | c        |                                                       |
| a                 | b  | c        |                                                       |

2. Do you agree that the following clinical features as single feature [S] or in combination only [C] are highly suggestive of Glut1D and warrant LP and SLC2A1 analysis?

|                                                                                         | [S] | [C] |
|-----------------------------------------------------------------------------------------|-----|-----|
| Paroxysmal eye movements in infancy                                                     |     |     |
| Unexplained paroxysmal events (any age)                                                 |     |     |
| Developmental delay otherwise unexplained                                               |     |     |
| Effective seizure control by KD in children with intractable epilepsy                   |     |     |
| Early-onset intractable childhood epilepsy unresponsive to AEDs                         |     |     |
| Early-onset absence epilepsy                                                            |     |     |
| Myotonic-atonic epilepsy (Doose Syndrome)                                               |     |     |
| Any complex movement disorder with spasticity, dystonia, ataxia as predominant features |     |     |
| Alternating hemiplegia                                                                  |     |     |
| Stroke-like episodes                                                                    |     |     |
| Other:                                                                                  |     |     |

3. diagnostic workup for Glut1D (not for introduction of KD!) should include:

|          |                                          | I agree |
|----------|------------------------------------------|---------|
| Blood    | Basic lab (renal/liver/thyroid function) |         |
|          | Full blood count                         |         |
|          | lactate                                  |         |
|          | Amino acids                              |         |
|          | Fasting lipids (TCHOL, TG, HDLC, LDLC)   |         |
| Urine    | Amino acids, organic acids               |         |
| Others   | EEG                                      |         |
|          | Fasting EEG                              |         |
|          | Cranial MRI                              |         |
|          | Cranial PET                              |         |
| Genetics | SLC2A1 sequencing                        |         |
|          |                                          |         |
|          |                                          |         |

4. KDTs in Glut1D should be started as early as possible. Yes/No

5. The higher the ketosis, the more beneficial a KDT in Glut1D. Yes/No

6. In Glut1D patients beyond infancy with generalized seizures (excluding absence epilepsy) unresponsive to KD please rank the following AEDs you apply in your center:

RANK (1-5)

- valproate (in girls not beyond puberty) .....
- lamotrigine .....
- ethosuximide .....
- levetiracetam .....
- other (only 1 AED): ..... .....

7. In Glut1D patients with movement disorders/paroxysmal events unresponsive to KDT do you recommend an individual trial of

- Alpha-lipoic acid Yes/No
- Triheptanoin Yes/No
- acetazolamide Yes/No

8. I agree with the following statements of the 2018 KD consensus guidelines on the use of KD:

- KDTs are the treatment of first choice for Glut1D Yes/No
- Introducing and maintaining KDTs for Glut1D does not differ from general recommendations for management of KD's as described in Epilepsia Open. 2018 May 21;3(2):175-192. Yes/No
- Adverse effects of KDT in Glut1D do not differ from KDT for intractable epilepsy and require similar monitoring. Yes/No
- The MAD is used effectively in adolescents, and adults with Glut1D and provides a good alternative to the classic KDT Yes/No
- The MAD can be considered for a school-aged child with Glut1D if the parents refuse the KD Yes/No
- Adults with Glut1DS also benefit from KDT and should be encouraged to try it Yes/No
- The LGIT should currently not be used in Glut1D Yes/No
- Glut1D patients with epilepsy should be trialed on KDT, not on alternative options (e.g. ketoesters) without KDT? Yes/No
- Glut1D patients with movement disorders should be trialed on KDT, not on alternative options without KDT? Yes/No

9. All patients on KDT with Glut1D should have carnitine levels checked regularly? Yes/No

10. All patients on KDT with Glut1D should be on daily carnitine regardless of levels Yes/No

X. Any other important questions for discussion at meetings?  
(fill in please)

.....  
Thanks!!

Joerg Klepper and Eric Kossoff  
Contact: joerg.klepper@klinikum-ab-alz.de
